# Supplementary material for: The Holin-Endolysin Lysis System of the OP2-Like Phage X2 Infecting Xanthomonas oryzae pv. oryzae
Source: MDPI journal article supplement (doi:10.3390/v13101949), 2021-09-28
Supplement: s1 [file s1]

Table S1 Phage X2 genome annotation analysis.

| ORF | Coding region (bp) | Strand | Protein size (aa) | Putative function                                        | Best match <sup>a</sup> | Accession no. |
|-----|--------------------|--------|-------------------|----------------------------------------------------------|-------------------------|---------------|
| 1   | 2-661              | +      | 219               | Transposon or IS                                         | XPP1 (98%)              | QRI46302      |
| 2   | 670-2085           | +      | 471               | hypothetical protein                                     | OP2 (99%)               | QRI46303      |
| 3   | 2645-2127          | -      | 172               | hypothetical protein                                     | OP2 (100%)              | QRI46304      |
| 4   | 2862-2635          | -      | 75                | Phage protein                                            | OP2 (100%)              | QRI46305      |
| 5   | 3383-2859          | -      | 174               | Membrane-bound lytic murein transglycosylase D precursor | XPV2 (98%)              | QRI46306      |
| 6   | 3753-3373          | -      | 126               | hypothetical protein                                     | OP2 (99%)               | QRI46307      |
| 7   | 3988-3746          | -      | 80                | hypothetical protein                                     | XPV2 (95%)              | QRI46308      |
| 8   | 4598-3981          | -      | 205               | hypothetical protein                                     | XPV2 (85%)              | QRI46309      |
| 9   | 4777-4595          | -      | 60                | hypothetical protein                                     | XPV1 (97%)              | QRI46310      |
| 10  | 5168-4788          | -      | 126               | Phage Holliday junction resolvase RusA                   | XPV2 (97%)              | QRI46311      |
| 11  | 5350-5481          | +      | 43                | hypothetical protein                                     | /                       | QRI46312      |
| 12  | 6122-5535          | -      | 195               | hypothetical protein                                     | XPP1 (97%)              | QRI46313      |
| 13  | 6288-6139          | -      | 49                | hypothetical protein                                     | XPP1 (100%)             | QRI46314      |
| 14  | 6974-6342          | -      | 210               | hypothetical protein                                     | XPP1 (99%)              | QRI46315      |
| 15  | 7465-7502          | -      | 137               | hypothetical protein                                     | XPP1 (97%)              | QRI46316      |
| 16  | 7616-7452          | -      | 54                | hypothetical protein                                     | XPP9 (94%)              | QRI46317      |
| 17  | 8815-7613          | -      | 400               | hypothetical protein                                     | OP2 (95%)               | QRI46318      |
| 18  | 9373-9840          | +      | 155               | Phage integrase                                          | XPP9 (98%)              | QRI46319      |
| 19  | 9837-11291         | +      | 484               | Phage terminase, large subunit                           | XPP1 (99%)              | QRI46320      |
| 20  | 11334-12932        | +      | 532               | hypothetical protein                                     | XPV2 (99%)              | QRI46321      |
| 21  | 12973-13770        | +      | 265               | Phage minor capsid protein                               | XPV1 (97%)              | QRI46322      |
| 22  | 13926-15023        | +      | 365               | Phage head and packaging protein                         | XPP3 (92%)              | QRI46323      |
| 23  | 15037-15570        | +      | 177               | putative structural protein                              | OP2 (100%)              | QRI46324      |
| 24  | 15604-16623        | +      | 339               | putative structural protein                              | OP2 (96.76%)            | QRI46325      |
| 25  | 16690-17175        | +      | 161               | hypothetical protein                                     | OP2 (90.00%)            | QRI46326      |
| 26  | 17188-17691        | +      | 167               | hypothetical protein                                     | OP2 (99.40%)            | QRI46327      |
| 27  | 17688-18194        | +      | 168               | putative RNA polymerase                                  | OP2 (98.21%)            | QRI46328      |
| 28  | 18191-18616        | +      | 141               | hypothetical protein                                     | XPP1 (100.00%)          | QRI46329      |
| 29  | 18613-19140        | +      | 175               | hypothetical protein                                     | XPP1 (98.29%)           | QRI46330      |
| 30  | 19164-20648        | +      | 494               | hypothetical protein                                     | XPV1 (98.58%)           | QRI46331      |

|    |             |   |     |                           |                |                |
|----|-------------|---|-----|---------------------------|----------------|----------------|
| 31 | 20661-21095 | + | 144 | hypothetical protein      | OP2 (97.22%)   | QRI46332       |
| 32 | 21346-21146 | - | 66  | hypothetical protein      | XPV1 (53.70%)  | QRI46333       |
| 33 | 21873-21343 | - | 176 | hypothetical protein      | XPV1 (85.70%)  | QRI46334       |
| 34 | 22417-21860 | - | 185 | hypothetical protein      | XPV1 (96.76%)  | QRI46335       |
| 35 | 22593-22417 | - | 58  | hypothetical protein      | XPP1 (96.55%)  | QRI46336       |
| 36 | 22824-23735 | + | 303 | hypothetical protein      | /              | QRI46337       |
| 37 | 24448-23933 | - | 171 | hypothetical protein      | OP2 (98.83%)   | QRI46338       |
| 38 | 24636-24445 | - | 63  | hypothetical protein      | XPV1 (95.24%)  | QRI46339       |
| 39 | 24800-24633 | - | 55  | hypothetical protein      | XPP1(100.00%)  | QRI46340       |
| 40 | 25026-24823 | - | 67  | hypothetical protein      | OP2 (98.51%)   | QRI46341       |
| 41 | 25276-25037 | - | 79  | hypothetical protein      | XPP1 (98.73%)  | QRI46342       |
| 42 | 27357-25381 | - | 658 | putative DNA polymerase I | OP2 (98.63%)   | QBA09445.<br>1 |
| 43 | 27801-27421 | - | 126 | hypothetical protein      | XPP1 (98.41%)  | QRI46343       |
| 44 | 29713-27869 | - | 614 | putative phage helicase   | OP2 (98.86%)   | QRI46344       |
| 45 | 29998-29807 | - | 63  | hypothetical protein      | XPP1(100.00%)  | QRI46345       |
| 46 | 30186-29995 | - | 63  | hypothetical protein      | XPP1 (98.41%)  | QRI46346       |
| 47 | 30371-30183 | - | 62  | hypothetical protein      | XPV1(100.00%)  | QRI46347       |
| 48 | 30571-30368 | - | 67  | hypothetical protein      | XPV1 (88.06%)  | QRI46348       |
| 49 | 30812-30561 | - | 83  | hypothetical protein      | XPV2 (89.16%)  | QRI46349       |
| 50 | 31228-30812 | - | 138 | hypothetical protein      | XPP8 (92.03%)  | QRI46350       |
| 51 | 31699-31457 | - | 80  | hypothetical protein      | XPV3 (95.00%)  | QRI46351       |
| 52 | 31839-31696 | - | 47  | hypothetical protein      | XPP1 (95.74%)  | QRI46352       |
| 53 | 32137-31952 | - | 61  | hypothetical protein      | XPV2 (98.36%)  | QRI46353       |
| 54 | 32382-32134 | - | 82  | hypothetical protein      | OP2 (98.78%)   | QRI46354       |
| 55 | 32930-32379 | - | 183 | hypothetical protein      | XPP1 (98.91%)  | QRI46355       |
| 56 | 33387-32935 | - | 150 | hypothetical protein      | OP2 (100.00%)  | QRI46356       |
| 57 | 33808-33419 | - | 129 | hypothetical protein      | XPP1 (100.00%) | QRI46357       |
| 58 | 34097-33825 | - | 90  | hypothetical protein      | XPV1 (97.78%)  | QRI46358       |
| 59 | 34421-34107 | - | 104 | hypothetical protein      | XPP1 (98.08%)  | QRI46359       |
| 60 | 34655-34446 | - | 69  | hypothetical protein      | XPP4 (100.00%) | QRI46360       |
| 61 | 37236-34723 | - | 837 | hypothetical protein      | XPV2 (99.52%)  | QRI46361       |
| 62 | 37382-37248 | - | 44  | hypothetical protein      | /              | QRI46362       |

|    |             |   |     |                             |                |          |
|----|-------------|---|-----|-----------------------------|----------------|----------|
| 63 | 37409-37525 | + | 38  | hypothetical protein        | XPP3 (73.68%)  | QRI46363 |
| 64 | 37750-38133 | + | 127 | hypothetical protein        | OP2 (100.00%)  | QRI46364 |
| 65 | 38130-38531 | + | 133 | hypothetical protein        | XPP9 (98.50%)  | QRI46365 |
| 66 | 38605-39219 | + | 204 | putative tail fiber protein | OP2 (99.02%)   | QRI46366 |
| 67 | 39389-39928 | + | 179 | hypothetical protein        | XPP1 (99.44%)  | QRI46367 |
| 68 | 39952-40347 | + | 131 | hypothetical protein        | OP2 (100.00%)  | QRI46368 |
| 69 | 40351-41025 | + | 224 | hypothetical protein        | OP2 (100.00%)  | QRI46369 |
| 70 | 41029-42864 | + | 611 | Phage tail protein          | OP2 (98.04%)   | QRI46370 |
| 71 | 42869-43768 | + | 299 | hypothetical protein        | XPP1 (99.33%)  | QRI46371 |
| 72 | 43752-43994 | + | 80  | hypothetical protein        | OP2 (100.00%)  | QRI46372 |
| 73 | 43987-44649 | + | 220 | putative baseplate protein  | OP2 (96.82%)   | QRI46373 |
| 74 | 44667-45941 | + | 424 | hypothetical protein        | XPP1 (100.00%) | QRI46374 |

---

“/” means no significant matched in GenBank. <sup>a</sup>all matched phages belong to the *Xanthomas* phage.
